## Achieving Inclusive Healthcare through Integrating Education and Research with AI and Personalized Curricula

Amir Bahmani<sup>1,2\*</sup> †, Kexin Cha<sup>1,2,\*</sup>, Arash Alavi<sup>1,2,\*</sup>, Amit Dixit<sup>1,2,\*</sup>, Antony Ross<sup>1,2</sup>, Ryan Park<sup>1,2</sup>, Francesca Goncalves<sup>1,2</sup>, Shirley Ma<sup>1,2</sup>, Paul Saxman<sup>5</sup>, Ramesh Nair<sup>1</sup>, Ramin Akhavan-Sarraf<sup>2</sup>, Xin Zhou<sup>1,2</sup>, Meng Wang<sup>1</sup>, Kévin Contrepois<sup>1</sup>, Jennifer Li Pook Than<sup>1</sup>, Emma Monte<sup>1</sup>, David Jose Florez Rodriguez<sup>2</sup>, Jaslene Lai<sup>2</sup>, Mohan Babu<sup>1,2</sup>, Abtin Tondar<sup>2</sup>, Sophia Miryam Schüssler-Fiorenza Rose<sup>1</sup>, Ilya Akbari<sup>2</sup>, Xinyue Zhang<sup>1,6</sup>, Kritika Yegnashankaran<sup>4</sup>, Joseph Yracheta<sup>7</sup>, Kali Dale<sup>7</sup>, Alison Derbenwick Miller<sup>2</sup>, Scott Edmiston<sup>9</sup>, Eva M McGhee<sup>8</sup>, Camille Nebeker<sup>10</sup>, Joseph C. Wu<sup>6</sup>, Anshul Kundaje<sup>1,3</sup>, Michael Snyder<sup>1,2</sup> †

- 1) Department of Genetics, Stanford University, CA
- 2) Stanford Deep Data Research Center, Stanford University, CA
- 3) Department of Computer Science, Stanford University, CA
- 4) Center for Teaching and Learning, Stanford University, CA
- 5) Amazon Web Services, Seattle, WA
- 6) Stanford Cardiovascular Institute, Stanford University, CA
- 7) Native BioData Consortium, Eagle Butte, SD
- 8) Martin Luther King Jr. Community Healthcare Hospital, Los Angeles, CA
- 9) Office of the Vice Provost and Dean of Research, Stanford University, CA
- 10) Herbert Wertheim School of Public Health and Human Longevity Science, UC San Diego, San Diego, CA

\* These authors contributed equally to this work.

† Corresponding authors: [abahman@stanford.edu](mailto:abahman@stanford.edu), [mpsnyder@stanford.edu](mailto:mpsnyder@stanford.edu)

## **Abstract**

Precision medicine promises significant health benefits but faces challenges such as the need for complex data management and analytics, interdisciplinary collaboration, and education of researchers, healthcare professionals, and participants. Addressing these needs requires the integration of computational experts, engineers, designers, and healthcare professionals to develop user-friendly systems and shared terminologies. The widespread adoption of large language models (LLMs) like GPT-4 and Claude 3 highlights the importance of making complex data accessible to non-specialists. The Stanford Data Ocean (SDO) strives to mitigate these challenges through a scalable, cloud-based platform that supports data management for various data types, advanced research, and personalized learning in precision medicine. SDO provides AI tutors and AI-powered data visualization tools to enhance educational and research outcomes and make data analysis accessible for users from diverse educational backgrounds. By extending engagement and cutting-edge research capabilities globally, SDO particularly benefits economically disadvantaged and historically marginalized communities, fostering interdisciplinary biomedical research and bridging the gap between education and practical application in the biomedical field.

## **Keywords**

Artificial Intelligence, Large Language Model Data Visualization, Precision Medicine, Personalized Learning, Multi-Omics, Wearables, Ethics

## Main

Precision medicine utilizes comprehensive health data to facilitate individualized disease prevention, diagnosis, and treatment by accounting for distinct biological, lifestyle, and environmental differences<sup>1</sup>. The process of extracting valuable insights from health data necessitates bioinformatics expertise, access to low-latency systems for secure and scalable data collection, and efficient processing and storage of vast volumes of multi-modal data. However, the high costs of acquiring such expertise and computing resources confine precision medicine advancements to well-funded institutions in high-income countries (HICs), thereby perpetuating the disparity in biomedical research, disease diagnosis, and treatment in low- and middle-income countries (LMICs)<sup>2,3</sup>.

Training precision medicine professionals in underserved and underprivileged communities not only fosters inter-regional research collaborations that pool diverse expertise and financial resources but crucially enhances local healthcare outcomes. By empowering these communities with skilled professionals, more tailored and effective health interventions will be enabled, directly addressing their unique health challenges. This approach not only generates significant amounts of data and leads to high-impact publications<sup>4</sup>, but more importantly, it translates into tangible improvements in personal health, ensuring that the primary goal of such training is to enhance the well-being of the community members.

By incorporating diverse data and facilitating extensive knowledge exchange, noteworthy collaborations have proven to accelerate biomedical discoveries, such as the Encyclopedia of DNA Elements (ENCODE)<sup>5</sup>, the Human Microbiome Project<sup>6</sup>, the International Cancer Genome Consortium (ICGC)<sup>7</sup>, the Human Heredity and Health in Africa (H3Africa) Initiative<sup>8</sup>, and the Global Alliance for Genomics and Health (GA4GH)<sup>9</sup>. By equipping professionals in underrepresented communities with precision medicine training, we hope to better serve them as well as directly address local data deficits and ethical challenges, thereby enhancing health outcomes. Moreover, the study of underrepresented groups is expected to generate new knowledge. For example, the H3Africa Initiative revealed more than 3 million new genetic variants relevant to viral immunity, DNA repair, and metabolism from data of 426 people across 50 African ethnolinguistic groups<sup>10</sup>. Since only 2% of data in genome-wide association studies (GWAS) were from African populations, few research discoveries are specific to these populations<sup>11</sup>. For American Indian/Alaska Native communities, the data deficit is partially due to the mistrust from research misconduct<sup>83,84</sup>. However, prioritizing the communities' needs and incorporating tribal governance in the research process have led to recent successful research collaborations<sup>12</sup>.

In addition, the growing bioinformatics and engineering demand in precision medicine calls for effective training of non-life science professionals to contribute to large-scale initiatives, such as the Molecular Transducers of Physical Activity Consortium (MoTrPAC)<sup>13</sup>, Human BioMolecular Atlas Program (HuBMAP)<sup>14</sup>, Human Tumor Atlas Network (HTAN)<sup>15</sup>, Bridge to Artificial Intelligence (Bridge2AI)<sup>16</sup>, Human Microbiome Project (HMP)<sup>17</sup>, and Genotype-Tissue Expression (GTEx) project<sup>18</sup>. Large language models (LLMs) have the potential to become the propeller to deliver personalized education at scale, and to enable patients to gain actionable

insights from healthcare data<sup>19-22</sup>. Studies<sup>23-27</sup> have shown that personalized learning can significantly increase student engagement and satisfaction, leading to improved learning outcomes.

In order to enable economically disadvantaged and historically marginalized communities to become active contributors to precision medicine research and improve community health, we designed and implemented the Stanford Data Ocean (SDO) as a cloud-based, serverless, LLMs-powered platform for researchers and learners to seamlessly access and analyze large biomedical datasets, including public datasets—such as multi-omics and wearables. SDO also offers precision medicine certificate training.

## Results

### Stanford Data Ocean Overview

SDO was designed to achieve three primary objectives: 1) robust data management that enables ease of access to diverse multi-omics and wearable data, ranging from fully open access (e.g., COVID19 wearable datasets<sup>42,70</sup>) to partially restricted (Integrated Personal Omics Profiling project datasets<sup>71,77</sup>); 2) personalized education through the use of large-scale datasets and LLMs; and 3) cutting-edge research analytics that capitalizes on AI-driven visualization. Additionally, by transforming scientific papers into standalone learning modules—comprising datasets, code, and exercises—SDO accelerates research innovation while promoting reproducibility and collaborative knowledge sharing.

The platform achieves scalability by simplifying the initial setup by eliminating the need for extensive technical expertise and infrastructure maintenance. It also effectively enhances the learning experience through the integration of containerization and virtual machines, ensuring uninterrupted access to educational content. The microservice architecture and real-time monitoring tools optimize performance and security, adhering to HIPAA standards. The platform also standardizes modules to promote consistency and reproducibility in bioinformatics research, supporting sustainable development in precision medicine. For more details, see **Methods**.

### Comprehensive Multi-Database Platform for Integrated Biomedical Data Analysis

SDO provides a multi-database platform designed to handle a wide variety of biomedical data types, including wearables, genomics, epigenomics, microbiome, metabolomics, and proteomics. This diversity allows researchers to create comprehensive, real-time cohorts by integrating multiple data types, which can be pivotal for precision medicine research and personalized healthcare interventions. Users can seamlessly access and analyze these datasets through an integrated Jupyter notebook environment. The platform supports data from 107 iPOP subjects with 1416 visits in multiple longitudinal studies<sup>71,77,85</sup>, encompassing RNAseq, lipidomics, microbiome (gut 16s, nares 16s), metabolites, cytokine, targeted assays, and clinical test data (8637 datasets total). 107 genome sequences are also available. Additionally, SDO includes de-identified data (sleep, heart rate, step) for two COVID studies: an early COVID-19 detection study of 5,300 participants (280 datasets and over 104 million data points)<sup>70</sup> and a real

time alerting study of 3,318 participants (4246 datasets and over 1.5 billion data points)<sup>42</sup>. These datasets enable SDO to offer extensive research and educational activities.

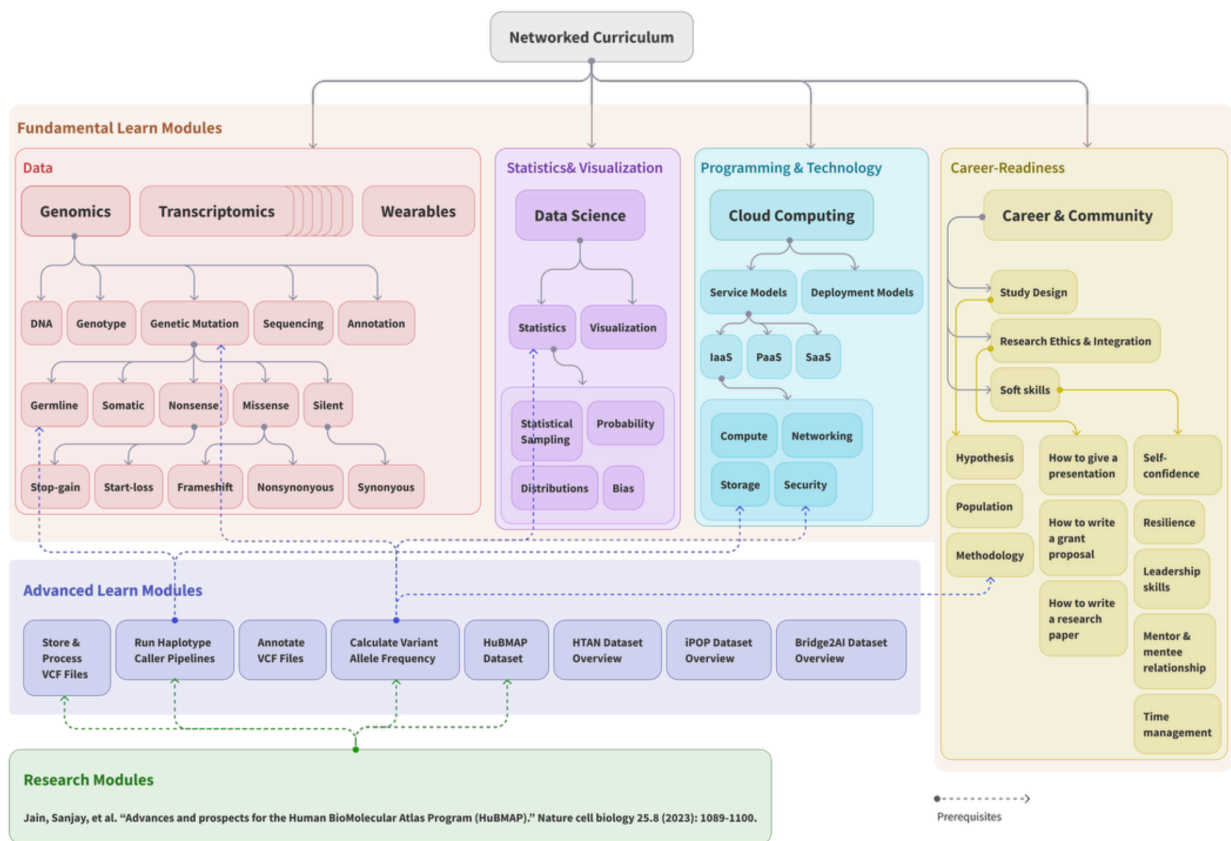

A. A Sample Networked Curriculum

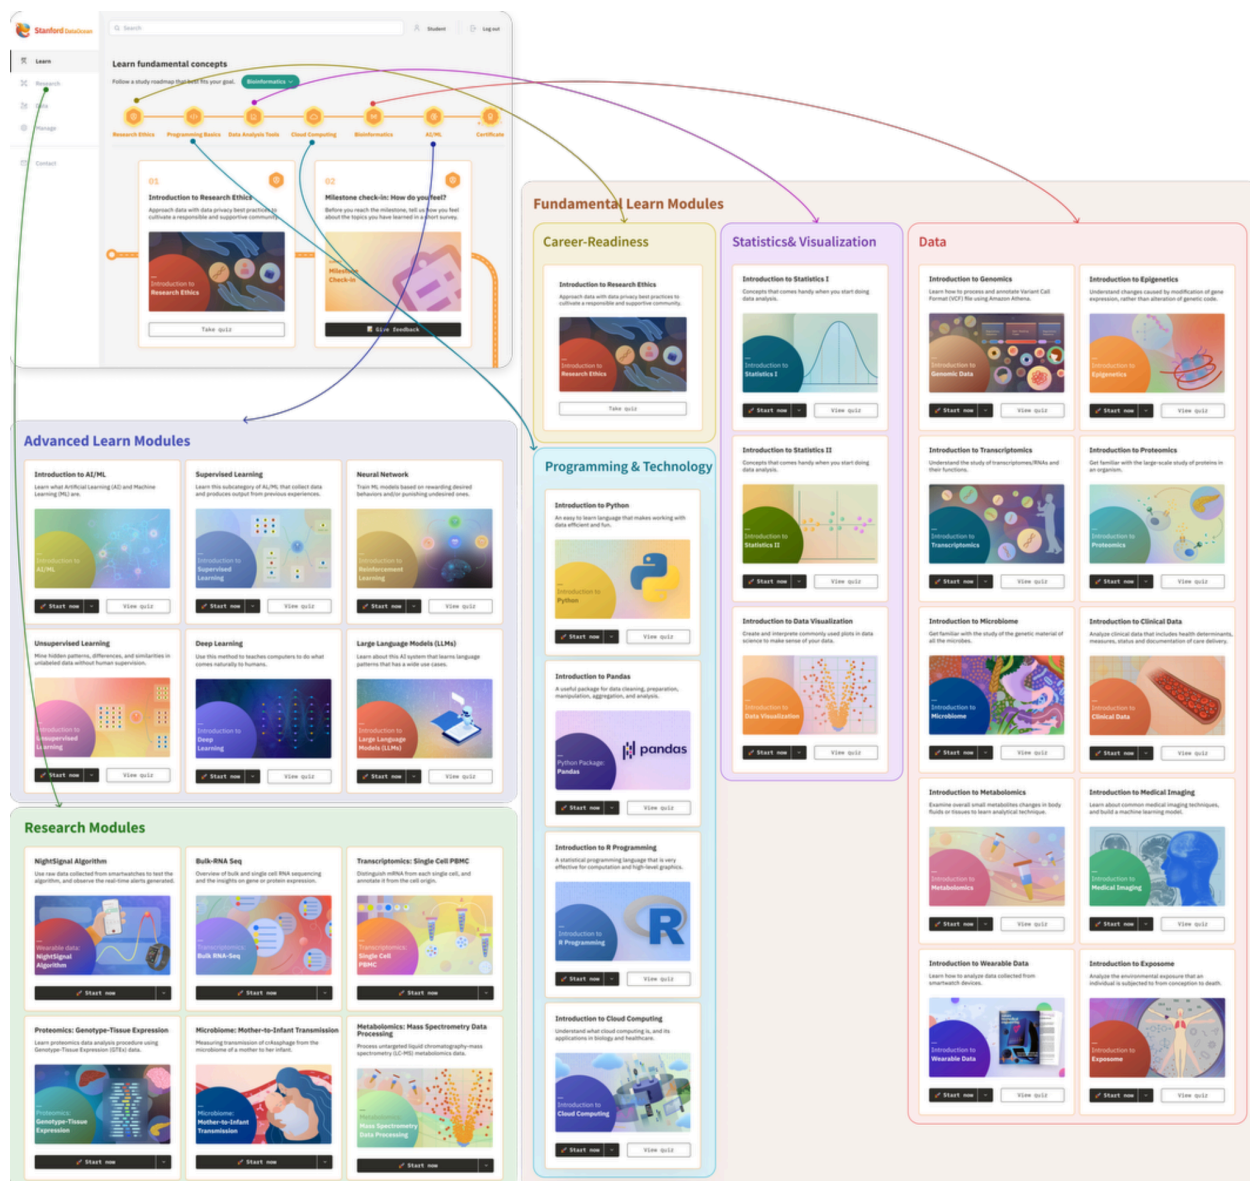

B. The integrated network curriculum on the Stanford Data Ocean (SDO)

**Figure 1. Comprehensive Networked Curriculum for Personalized Medicine Education on Stanford Data Ocean. A. A Sample Networked Curriculum.** A well-rounded curriculum in personalized medicine education includes networked modules in all relevant disciplines. This sample modular, networked curriculum consists of four major types of modules: 1) *Fundamental Learn Module*: training material for understanding fundamental concepts around data (e.g., multi-omics), statistics and visualization (e.g., probabilities and distributions), programming and technology (e.g., cloud computing), and Career Readiness (e.g., a series of modules designed to equip students with essential professional skills and industry insights.) The career readiness includes training in effective communication, teamwork, problem-solving, adaptability, and research capabilities such as how to design a study, how to write a scholarly article, and how to present a paper. It also covers career-specific skills such as data privacy ethics, project management, and the use of AI tools in real-world scenarios. These modules aim to bridge the gap between academic learning and the demands of the workplace, preparing students for

successful careers in bioinformatics and related fields; 2) *Advanced Learn Module*: a mix of multiple interdisciplinary concepts built on top of prerequisite fundamental modules (e.g., Processing large Variant Call Format (VCF) files needs the understanding of genetic mutation, basics statistics such as allele frequency, and how to store and process large files on the cloud); and 3) *Research Module*: a combination of advanced and fundamental modules and provide more advanced information around a certain research topic (e.g., a research paper on Advances and prospects for the Human BioMolecular Atlas Program (HuBMAP) needs understanding of the HuBMAP dataset such as germline mutations and how to process large VCF files on the cloud in a secure fashion). **B. The Integrated Network Curriculum on the Stanford Data Ocean (SDO)**. A sample network curriculum on SDO structured around 24 Learn modules divided into six key thematic areas: Ethics, Programming, Statistics and Visualization, Cloud Computing, Data (which includes Multi-omics and Wearables), and AI/ML. Each module functions as an independent unit equipped with various educational artifacts such as videos, interactive notebooks, exams, self-evaluations, and practical exercises. This design is intended to cultivate a thorough understanding and proficient practical skills in each specific domain, ensuring that learners gain both theoretical knowledge and hands-on experience relevant to the field of bioinformatics and AI/ML.

### **Making Learning Precision Medicine Accessible**

The curriculum, illustrated in **Figures 1A** and **1B**, outlines Fundamental Learning Modules covering foundational concepts such as Ethics, Programming, Statistics, Visualization, Cloud Computing, and Data Analysis (Multi-omics and Wearables), as well as Advanced Learning Modules that cover thematic areas like Artificial Intelligence (AI) and Machine Learning (ML) techniques and applications in precision medicine. It integrates continuously updated content based on the latest research findings<sup>29-32</sup> and includes interactive educational content using videos, guided Jupyter notebooks<sup>33</sup>, and exercises to support professional skill development.

The platform supports individuals with diverse educational backgrounds using a modular and networked curriculum, simplifying access without requiring software installations. This curriculum gradually introduces learners to bioinformatics, guiding them from basic concepts to advanced interdisciplinary topics such as biology, computer science, and statistics. This structured approach not only makes the field more accessible to beginners, but also accommodates personalized learning pathways, enhancing module reusability and keeping learners up-to-date with new developments<sup>28</sup>. Additionally, to help ensure accessibility to students of all technical levels and socio-economic backgrounds, SDO's AI-driven tutor and visualization tools offer 24/7 assistance. The SDO's modular course design enables educators to leverage a customizable curriculum by reusing existing modules and creating new ones. The train-the-trainer program provides educators with tools to implement instructional design best practices to effectively help students develop career-ready skills (see Career Readiness in **Figure 1A**).

The SDO educational platform is offered as a certificate program. Within a year since its inception in June 2023, SDO's precision medicine programs enrolled 637 students, offering free access to those earning under \$70,000. As of June 2024, 95.5% of scholarship applicants received free access in all the 50 U.S. states and 44 countries. Women take up 49%, projecting a positive long-term impact on their household education, healthcare, and income<sup>45,46</sup> (**Supplementary Table 1**).

### *Learning Outcome and Satisfaction*

We evaluated students' learning outcomes and programs satisfaction by measuring certificate completion rate, students' self-efficacy, and perceived program impact.

The overall SDO programs completion rate is 34.69%, and for structured cohort program, it is 85.71%, both exceeding the Massive Open Online Courses (MOOCs) at 7%-10%<sup>47-49</sup>. In addition, certified students are required to achieve above 80% answer accuracy on formative assessment in quiz format following each learning module and 75% accuracy on the certificate exam following completing all learning modules.

We measure self-efficacy by comparing students' 1-5 Likert scale confidence ratings before and after each learning module on how much they agree they can achieve the module's learning goals (see **Supplementary Table 3**). A significant growth in confidence ratings is observed across all learning modules, especially in Cloud Computing and Bioinformatics. Ratings of moderately confident and above increased by 56.65% to 93.81% for Cloud Computing and 57.21% to 91.15% for Bioinformatics (**Figure 2**). High academic self-efficacy in Science, Technology, Engineering, and Mathematics (STEM) is strongly associated with forming a science identity, taking more science courses, pursuing a science career, and predicting academic achievements<sup>50-53</sup>.

Aligning with high self-efficacy's career impact described in literature<sup>50-53</sup>, a survey of 72 certified respondents demonstrated high satisfaction. 97.5% reported the program's positive impact, including 22.8% securing internships or jobs, 27.8% developing interest to continue pursuing precision medicine, and 46.9% gaining confidence to apply for academic or professional opportunities. 93.8% wanted continued SDO involvement, either taking another course or teaching/ mentoring others. 84.7% recommended the program to others.



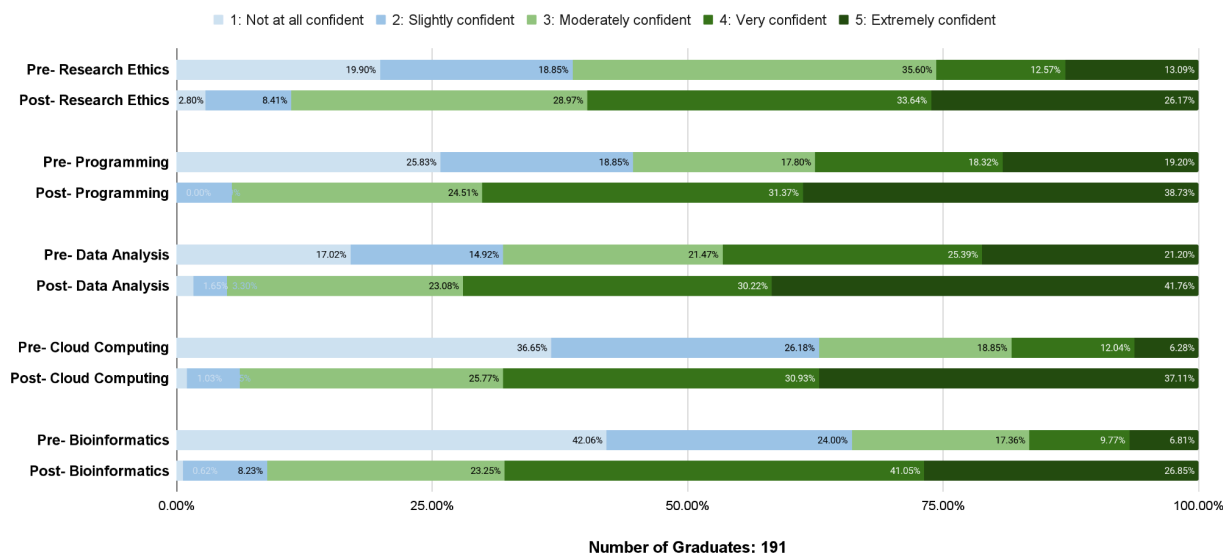

**Figure 2. Enhanced Student Confidence in Precision Medicine through the Bioinformatics Certificate Program.** Students' confidence levels were reported in surveys before and after learning modules completion for 191 students who graduated from the Bioinformatics certificate program. The SDO's Bioinformatics certificate program improves students' confidence in interdisciplinary topics in precision medicine. The figure shows increased self-reported confidence after completing learning modules in Research Ethics, Programming, Data Analysis, Cloud Computing, and Bioinformatics. By comparing the number of students who rated "3: Moderately confident", "4: Very confident", and "5: Extremely confident" before and after the learning modules, we observed notable self-reported confidence gains, particularly in Cloud Computing and Bioinformatics. 56.65% more students rated "3: Moderately confident" or above to the Cloud Computing learning goals after completing the learning module. 57.21% more students rated "3: Moderately confident" or above to the Bioinformatics learning goals after completing the Bioinformatics learning modules. Among 191 certified students, the number of students who feel moderately confident to highly confident in coding with Python, R, and Pandas rose by 39.28%, and in Statistics and Data Visualization by 26.99% after the learning modules.

### AI Tutor

We built an LLMs-powered AI Tutor on SDO that democratizes private tutoring for students who cannot afford or allocate time for traditional methods, benefiting economically disadvantaged and underrepresented groups by providing an accessible and high-quality educational support. This AI Tutor (see **Supplementary Fig. 1B**) specializes in questions pertinent to bioinformatics. It receives student inquiries, applies embedding techniques to identify the most relevant content within SDO, and uses prompt engineering to generate pertinent responses. Every interaction is scrutinized under multiple layers of guardrails to ensure the accuracy of the information, prevent the generation of erroneous or misleading content (hallucinations), and maintain relevance to the field of bioinformatics.

## *Evaluating AI Tutor's Performance*

We evaluated the AI Tutor's performance in three key areas: **1) Response Accuracy**, based on its answers to 246 bioinformatics questions created by the SDO team; **2) Guardrails Performance**, assessed through 2081 student-submitted questions; and **3) AI Tutor's Use Cases and Perceived Usefulness**.

### *Response Accuracy*

We compared 10 LLMs' responses to 246 SDO-team-constructed bioinformatics multiple-choice questions with our answer keys. **Figure 3** shows the performance of different LLMs: **Anthropic Claude 2**<sup>54</sup>, **Anthropic's Claude 3 Haiku**<sup>55</sup>, **Anthropic's Claude 3 Opus**<sup>56</sup>, **Anthropic's Claude 3 Sonnet**<sup>57</sup>, **Gemini 1.5 pro**<sup>58</sup>, **GPT-3.5**<sup>59</sup>, **GPT-4**, **GPT-4 Turbo**<sup>60</sup>, **GPT4o**<sup>61</sup>, **Meta Llama2**<sup>62</sup>. Initially, there were 298 questions, but 20 ambiguous questions flagged by the majority of the LLMs were removed.

In our study, we grouped general questions into three categories: Programming and Technology, Statistics (including Visualization and AI/ML), and Data (covering Multi-omics and Wearables), as depicted in **Fig. 1.A**. We conducted a detailed analysis of various LLMs' performances across these categories, as shown in **Fig. 3.A-D**, evaluating them on general and domain-specific multiple-choice questions. To evaluate the risk of LLMs giving erroneous answers without sufficient context, we compared the LLMs' accuracy of 32 questions (i.e., context-aware questions) that refer to specific information inaccessible to the LLMs, such as an image, a code block, or a research study (**Fig. 3.E**). In healthcare applications, when a model attempts to interpret missing data that a physician failed to provide without acknowledging it (i.e., hallucinating), the LLM-generated information could lead to significant health and financial cost. We also examined the models' differential responses to Python and R programming questions, noting a tendency in some LLMs to favor Python, which often leads to mistakes in R contexts (**Fig. 3.F**). This bias was further analyzed in Figures **3.G** and **3.H**, comparing the performance of models like GPT-4, GPT-3.5-turbo, and Claude 2 over two periods, November 2023 and June 2024.

The findings from our figures indicate that overall, the GPT-4 family generally outperforms other models across most question categories (**Fig. 3.A-D**). GPT-4o achieved the highest accuracy in General questions as well as Programming and Technology questions (**Fig. 3.A, B**), whereas GPT-4-turbo excelled in Statistics and Visualization questions, as well as Research Ethics, Multi-omics, and Wearable Data questions (**Fig. 3.C, D**). The Claude-3 family also performed strongly, particularly Claude-3 (Opus), which shows high accuracy in multiple categories. However, GPT-3.5-turbo performed poorly on context-specific questions (**Fig. 3.E**), indicating significant limitations in handling queries that require specific contextual understanding. The comparison of Python vs. R responses (**Fig. 3.F**) reveals a notable bias towards Python, with some models performing significantly better in Python than in R. Furthermore, the radar charts (**Fig. 3.G** and **3.H**) illustrate the improvements or regressions in model performance over time, with Claude-2 showing notable improvements in handling guardrail scenarios in June 2024 compared to November 2023.

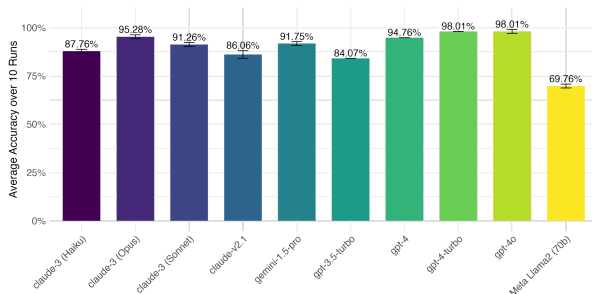

**A. Accuracy to General questions (n=246, excluding ambiguous and context-specific questions)**

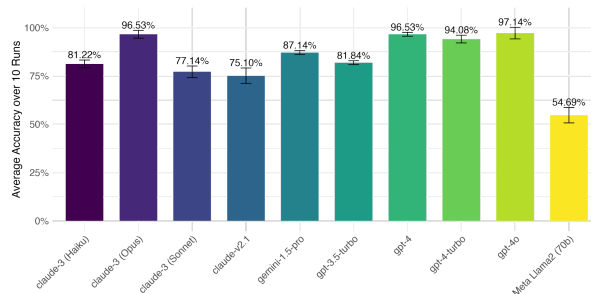

**B. Accuracy to Programming and Technology questions (n=49, excluding ambiguous and context-specific questions)**

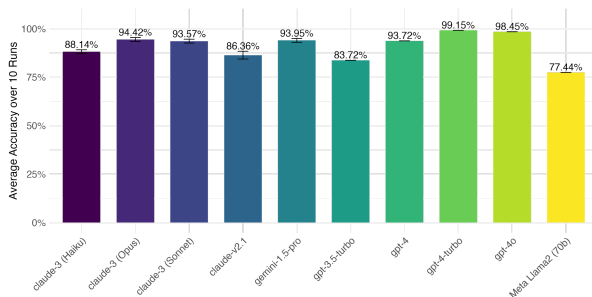

**C. Accuracy to Statistics and Visualization questions (n=129, excluding ambiguous and context-specific questions)**

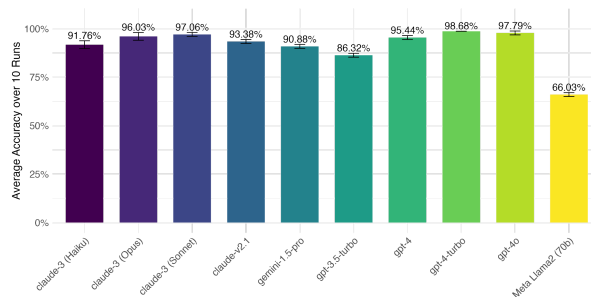

**D. Accuracy to Research Ethics, Multi-omics, and Wearable Data (n=68, excluding ambiguous and context-specific questions)**

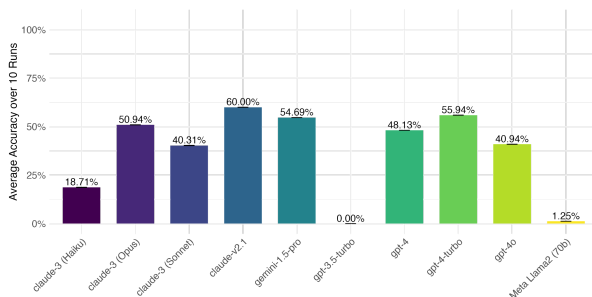

**E. Context-specific questions (n=32)**

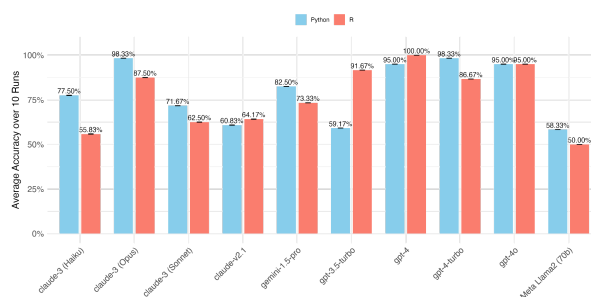

**F. Python (n=12) vs. R (n=12)**

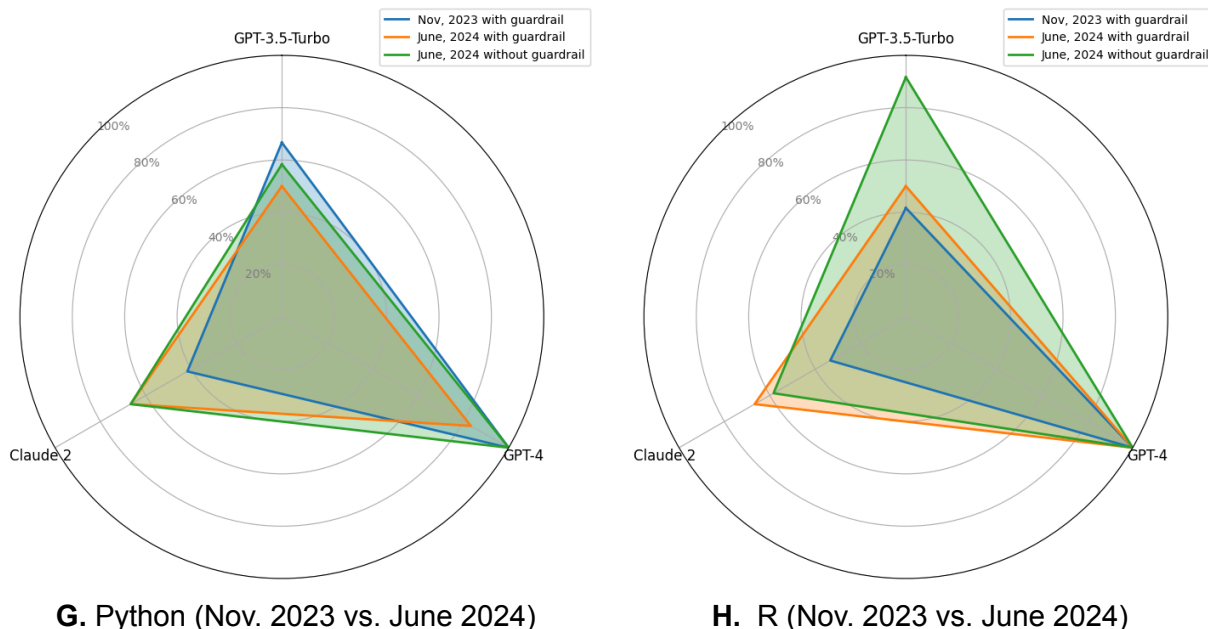

**Figure 3. Performance of Different LLMs for 298 Bioinformatics Questions.** **A.** Shows the performance on 246 general questions after removing 20 ambiguous questions and 32 context-aware questions. **B.** Displays the performance of LLMs for programming (R, Python, Pandas) and cloud computing questions (49 questions). **C.** Illustrates the performance of LLMs for statistics and visualization questions (129 questions). **D.** Depicts the performance of LLMs in answering questions related to research ethics, multi-omics, and wearable data questions (68 questions). **E.** Presents the performance of LLMs for context-aware questions (32 questions); the model was expected to either request additional context or indicate that it lacked the necessary context to respond accurately. Responses that failed to acknowledge the need for context were considered incorrect. **F.** comparing the performance of different models for Python (12 questions) vs. R (12 questions), showing some models are biased toward Python and cannot identify the R context well. **G** and **H.** Performance Comparison of GPT-3.5-turbo, GPT-4, and Claude 2 for Python (12 questions) and R (12 questions): November 2023 vs. June 2024 (with and without guardrail). Unlike in **Fig. 3. A-F**, where we used the bare LLM (Execution Engine), for **G** and **H**, we employed the AI Chatbot (see Supplementary Figure 1. B). Both the Execution Engine and the Guardrail utilized the same LLM. There are variations in performance in how these models differentiate between Python and R coding questions. Claude 2 showed significant improvement in handling R/Python questions. Similar findings are reported in recent studies<sup>63</sup>. Another observation concerns guardrails: GPT-3.5 flagged 5 out of 12 Python questions and 4 out of 12 R questions as irrelevant. It is important to consider while designing guardrails—none of the questions were flagged by GPT-4 as irrelevant in 2023 or 2024 (see **Supplementary Table 4**). The closed-source nature of some LLMs raises concerns about predictability and interpretability, particularly in critical fields like medicine, where decision-making is paramount.

### Evaluating AI Tutor's Guardrail Performance

We implemented the AI Tutor using GPT-4 in production as the default LLM, although learners can switch to other LLMs via the user interface. To ensure the AI Tutor responds only to questions related to the educational content in SDO, we built several guardrails (see

**Supplementary Fig. 1.B).** Given LLMs' constant development, which could result in unpredictable responses, we set constrained guardrails to mitigate risks while ensuring the AI Tutor can effectively support learning activities.

The performance of the 2082 AI Tutor responses to students' questions demonstrated its ability to adhere to the guardrails (**Supplementary Table 2**). The guardrail's precision was calculated at 100%, indicating no false positives among the predicted positives. Recall, or sensitivity, was 93.4%, reflecting that most positive cases were correctly identified. Specificity was 100%, meaning all true negatives were accurately recognized. Additionally, the F1 score, the harmonic mean of precision and recall, was 96.6%, providing a balanced measure of the model's accuracy in identifying both classes. Notably, there were 126 false negatives, indicating missed SDO-content-related questions. These metrics indicate AI Tutor is capable of providing correct and relevant answers to students, cultivating trustworthy interactions with students.

### **Evaluating AI Tutor's Use Cases and Perceived Usefulness**

SDO's blended learning model effectively combines self-paced modules with interactive AI-facilitated learning activities, significantly enhancing educational engagement and outcomes. Students utilizing this hybrid approach not only benefit from the flexibility of independent study but also gain substantial support through structured digital interactions, as shown by multiple studies<sup>64,65</sup>. This methodology particularly benefits underprivileged students, offering frequent opportunities to interact with AI tools, which is critical for developing AI literacy. Regular use of AI applications like GPT-4, which has demonstrated creativity surpassing 99% of people in terms of originality and fluency, and GitHub Copilot, which speeds up coding tasks by 55.8%, empowers students to enhance their creativity and productivity. This proficiency in AI tools not only boosts their project and career prospects in precision medicine but also enables participants to become efficient collaborators in research and reduces training periods in professional settings<sup>66-68</sup>.

**Figure 4A** shows that 46.7% of the most queried topics include Programming and Cloud Computing, while 21.2% cover Statistics, Visualization, AI/ML, and 20.3% relate to Bioinformatics/Omics-data. As for the types of questions, **Figure 4B** indicates that 39.5% of the inquiries involve clarifying or troubleshooting code, 18.2% ask about a quiz or exam, 13.8% are statistics questions, and 11.8% are bioinformatics questions.

A quantitative evaluation of the AI Tutor's impact shows high student satisfaction and perceived effectiveness. On the platform, 76.56% of responses were positively rated, and 66.7% of students on a six-point Likert scale strongly agreed that the AI Tutor enhanced their understanding of precision medicine (see **Supplementary Table 3**). Additionally, 23.4% moderately agreed, and only 9.4% slightly agreed. The AI Tutor excelled in programming and bioinformatics—key areas of precision medicine—with particularly high agreement in technology-related modules like statistics and cloud computing. These results highlight the AI Tutor's effectiveness in supporting student learning and identify potential areas for further improvement to optimize user experience.

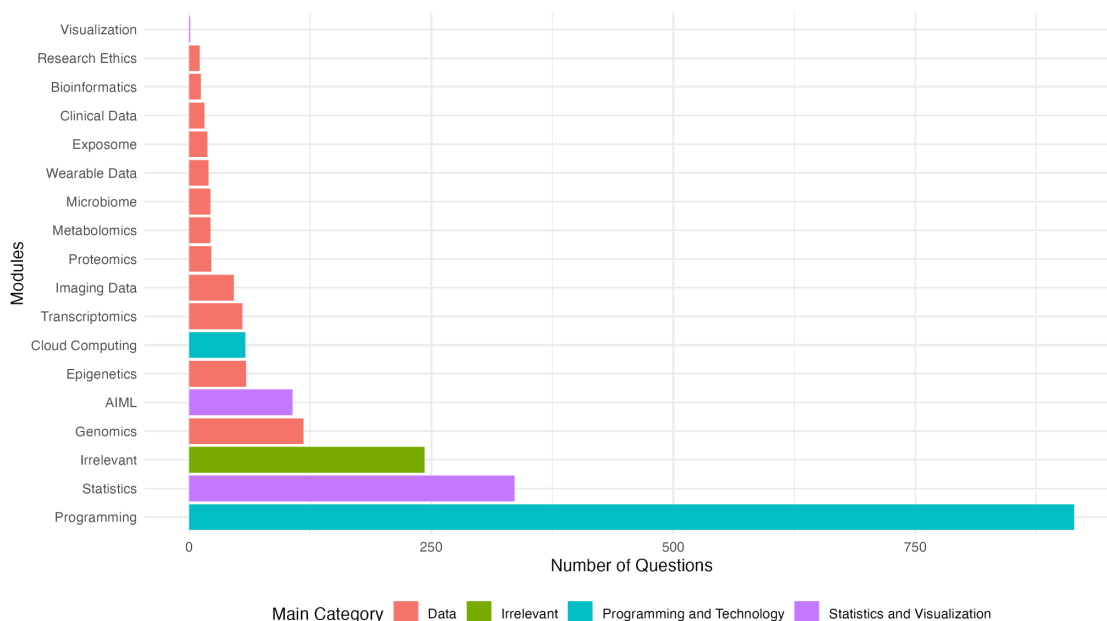

**A. Learners' Questions Categorized by Learning Modules Topics**

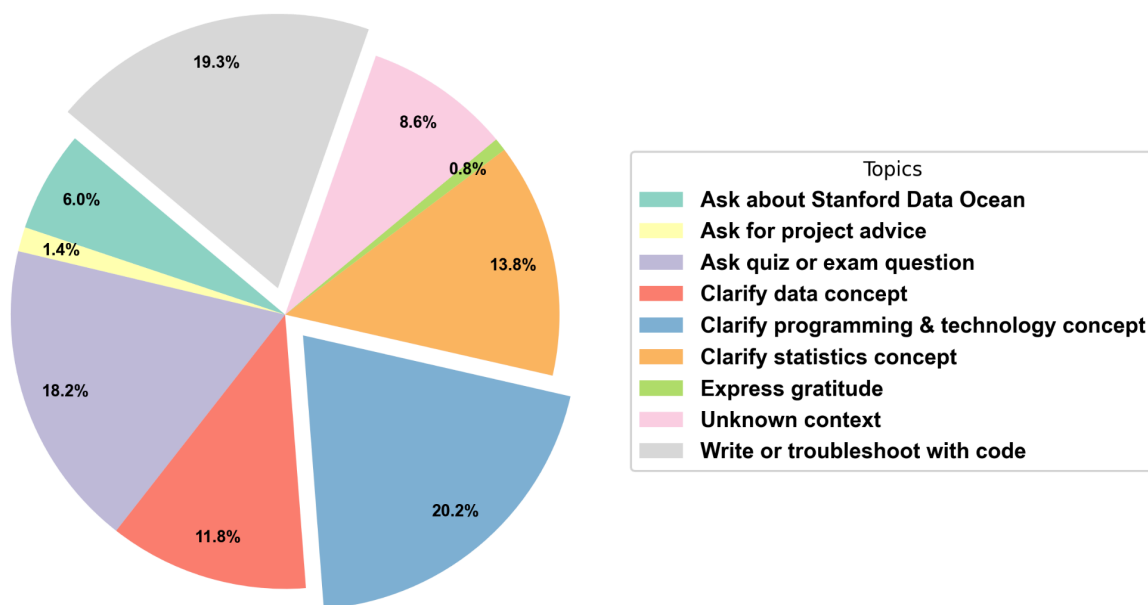

**B. Learners' Questions Categorized by Goals**

**Figure 4. Learner Engagement Analysis with AI Tutor. A.** 2,082 learners' questions (from 156 learners) categorized by learning modules topics. 43.9% of the questions are about Programmings, followed by 16.1% Statistics. a(ii) 47.3% of the questions labeled "Irrelevant" are questions about Stanford Data Ocean. 19.3% are questions that lack context to identify students' intentions; **B.** 2,082 questions are categorized by the goal students are trying to

accomplish by using AI Tutor. 20.2% are about clarifying programming and technology concepts, and 19.3% are about writing or troubleshooting code). We gave the AI Tutor a persona and described what it is and what it can do (e.g., "You are a helpful assistant well-versed in bioinformatics and related technologies. Please answer questions with all the needed context related to the Fundamental Modules content multi-omics, statistics, R, Python, etc. If a question pertains to a different topic, politely refuse to answer.")

## LLM-based Research Data Visualization

### *AI Tutor for Data Visualization: Fostering Algorithmic Thinking*

Analysis of learner queries in **Figure 4.B** reveals that 39.5% of learners concentrate their questions on aspects of programming, such as interpreting and troubleshooting code. This observation prompts a new research question emerging directly from the data: *Is extensive programming knowledge essential for completing precision medicine tasks?* The frequency of programming-related inquiries and the effectiveness of the AI Tutor by learners underscores the need to reevaluate and enhance how educational models integrate programming skills with domain-specific scientific training.

Programming fosters critical thinking and problem-solving skills<sup>69</sup> (e.g., through Divide-and-Conquer, Dynamic Programming, Greedy Algorithms, Graph Algorithms, Probabilistic and Analysis, and Randomized Algorithms). However the time dedicated to error handling, while potentially enhancing resilience by building persistence and adaptability, is time-consuming and detracts from valuable research hours that could be used to unlock biological mechanisms.

The SDO's platform enables users to import their own biomedical datasets for research analysis. This is accomplished through the data visualization tool which supports multi-modal analysis, accommodates a broader array of data formats, and incorporates automatic error handling, all while being compatible with both Python and R. For more details on this innovative approach, see **Methods**. The visualization component operates under the assumption of two primary user groups:

**1) Non-technical Users:** Users with no programming experience or data familiarity. Here, the platform first summarizes the dataset and leverages LLMs to generate an explanation of the data and potential visualization goals; users can then select their desired goal, prompting the system to utilize the LLM output and summary to automatically generate visualization code and produce the corresponding plots. This multi-step process (e.g., data summarization, goal generation, and elaboration, reading user-generated prompt, code creation, error handling, and plot generation) is further detailed in **Supplementary Fig. 1C**. Users can further explore the data by posing questions, with the platform assisting in code generation and visualization based on the provided query. **Fig. 5** illustrates the capability of SDO AI-facilitated visualization for autonomous interpretation and visualization of multi-omics and wearable sensor data.

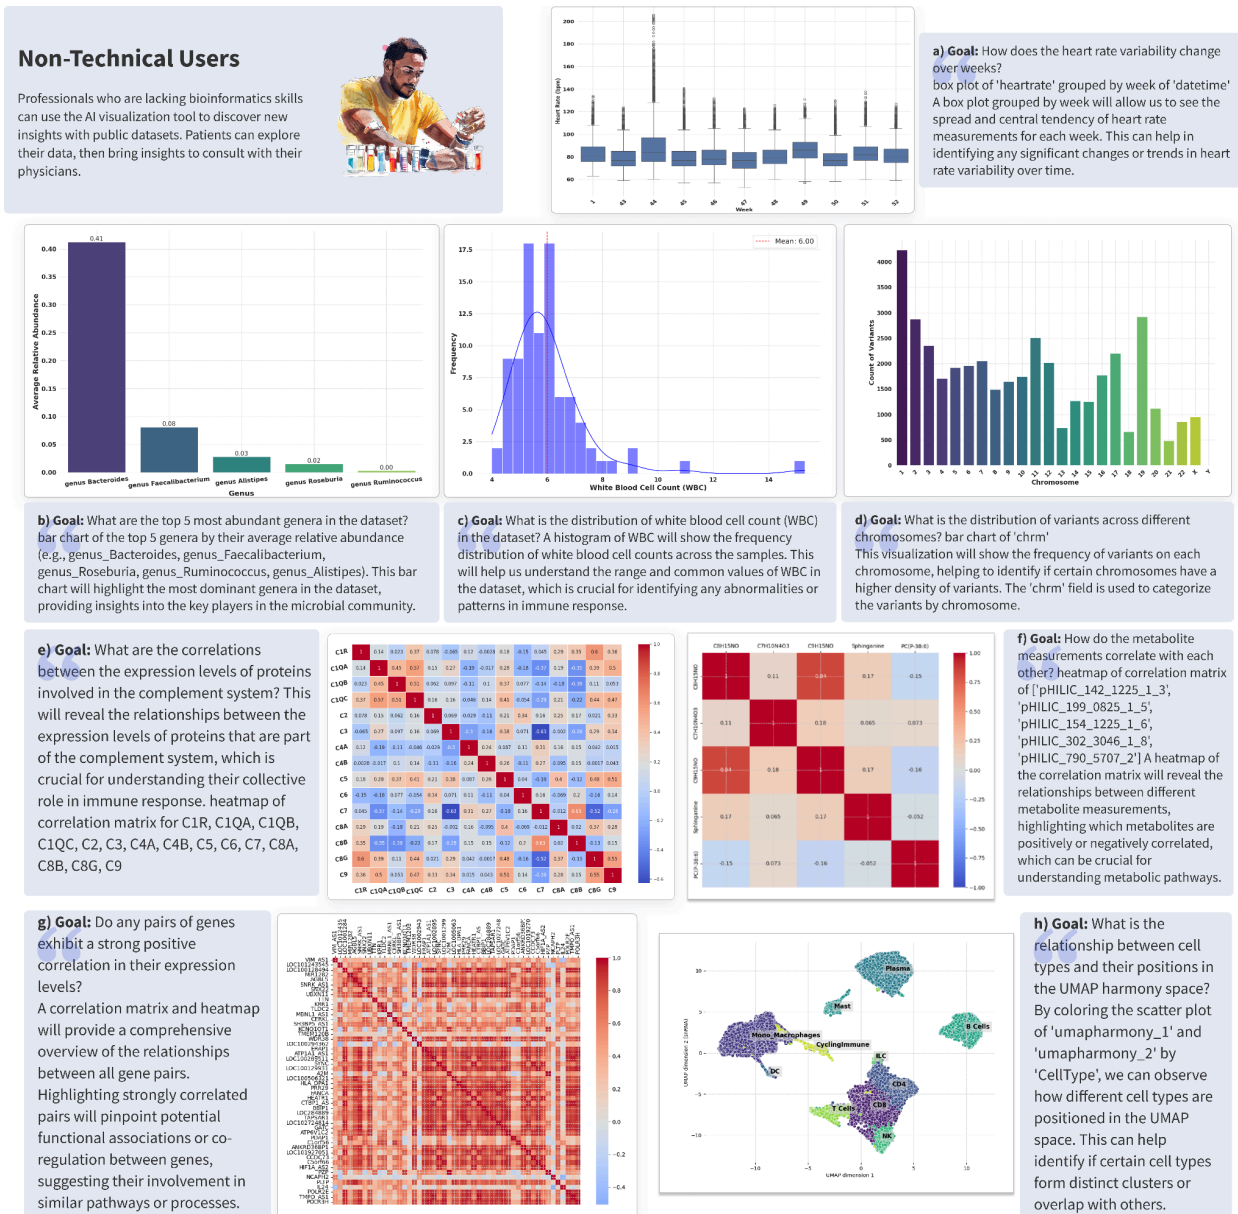

**Figure 5. Autonomous Interpretation and Visualization of Multi-Omics and Wearable Data through Language Model Integration. A. Heart Rate Variability Over Time (Wearable data):** Box plot showing weekly heart rate variability across different weeks, providing insights into changes in heart rate dynamics over time. **B. Dominant Bacterial Genera (Gut 16S data):** Bar graph illustrating the relative abundance of the top five most abundant bacterial genera in the dataset, highlighting key players in the microbial community. **C. White Blood Cell Count Distribution (Clinical data):** Histogram showing the frequency distribution of white blood cell counts, crucial for identifying abnormal immune response patterns. **D. Chromosomal Variant Distribution (Genomics data):** Bar chart representing the frequency distribution of genetic variants across different chromosomes, useful for identifying potential chromosomal hotspots of variability. **E. Protein Interaction in Immune Response (Proteomics data):** Correlation matrix



displaying relationships among protein expression levels involved in the complement system, aiding in understanding their collective roles in immune response. **F. Metabolite Intensity Correlations (Metabolomics data):** Heatmap showing correlations between spectral intensity measurements of metabolites, revealing interactions and dependencies crucial for metabolic studies. **G. Gene Expression Correlations (Transcriptomics data):** Correlation matrix and heatmap analyzing pairwise relationships between gene expression levels across the genome, providing insights into potential regulatory and co-regulatory networks. **H. Immune Cell Distribution (snRNA data):** UMAP representation of snRNA immune cells colored by cell type, illustrating the relationship between cell types and their positions in the UMAP harmony space. Users can fine-tune the visualization by providing feedback, such as changing the x-axis title. The data used in this demonstration were sourced from four independent studies: Mishra et al.<sup>70</sup> (Participant ID: A0NVTRV for Figure 5A), Zhou et al.<sup>71</sup> (Participant ID: ZOZOW1T for Figures 5B, 5C, 5E, 5F, 5G), the 1000 Genomes Project<sup>72</sup> annotated by the COSMIC68 dataset<sup>73</sup> for Figure 5D, and snRNA immune cells processed data from Fig. 4.C in Hickey et al.<sup>74</sup>.

**2) Technical Users:** Users with an understanding of data analysis but want to save time from low-level programming challenges like syntax, library management, debugging, and API updates (e.g., physicians, geneticists, or biologists). These users simply input the desired algorithm (see **Supplementary Figure 1.C**), prompting the system to generate the code and corresponding visualization. It is crucial to note that problem definition and **algorithmic thinking**—defined as *the ability to break down problems into a series of logical steps*—are essential elements of this process. Proper problem definition and algorithmic thinking are vital because they guide the AI in generating accurate and relevant code; without these, users may encounter incorrect or inefficient solutions. The AI Tutor supports users by helping them better define their problems and develop algorithmic thinking skills, ensuring the system produces the most appropriate code and visualizations. We showcase the versatility of the SDO platform in addressing various research questions posed by technical users (**Fig. 6**). **Figures 6A** through **6E** demonstrate the robustness and versatility of automated code generation for replicating and interpreting complex visualizations across diverse research domains.

**Reproducibility Feature:** Reproducing plots can be challenging due to authors potentially neglecting key parameters such as unclear naming conventions, data/plot inconsistencies, and inadequate data type specifications. Incomplete or unclear documentation on how to install and run code can pose a significant challenge to replication, especially for researchers who may not be well-versed in the necessary tools and package managers<sup>78,79</sup>. These inconsistencies significantly complicate reproducibility through conventional programming methods. To address this challenge, we have integrated an additional feature within the toolset. Users can provide the target figure and corresponding dataset, prompting the system to leverage LLMs and error handling to reproduce the plot. While successful in many cases, instances of author-specific assumptions (Unclear and inconsistent documentation) have rendered figure reproduction nearly impossible despite repeated LLM attempts. Consequently, users must intervene and provide feedback to the LLMs, nudging them to address these issues.

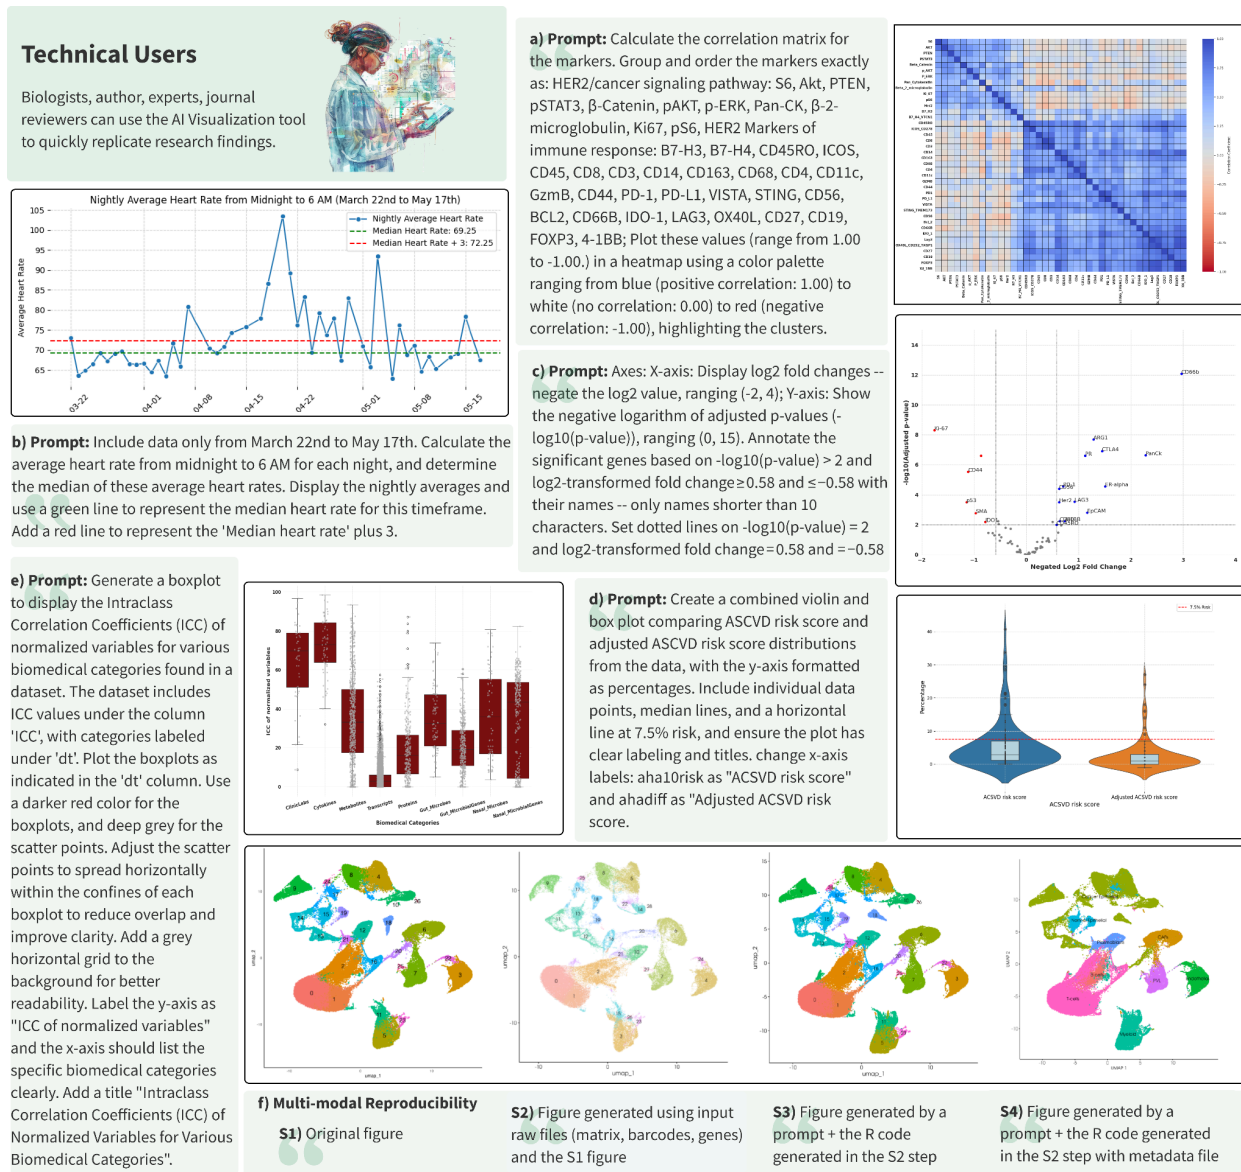

**Figure 6. Automated Code Generation and Execution from Natural Language Inputs for Data Visualization in Multi-Omics and Wearables Research. A. Protein Marker Correlation Analysis:** Heatmap displaying pairwise correlation coefficients for protein markers involved in pathological complete response (pCR) analysis. This figure replicates and expands upon the heatmap from Figure 2.c in McNamara et al.<sup>75</sup>, highlighting potential biomarker interactions in cancer pathways. **B. Heart Rate Analysis for COVID-19 Detection:** Line graph depicting daily average resting heart rates from March 22 to May 17th, identifying significant trends that could indicate physiological responses to COVID-19. This visualization is inspired by the NightSignal algorithm and replicates the scenario depicted in Figure 1.b in Alavi et al.<sup>42</sup>, illustrating variations in resting heart rate during the pandemic. **C. Differential Protein Expression in Oral Cancer:** Volcano plot contrasting protein expression profiles between bacteria-positive and -negative regions in oral squamous cell carcinoma. Adapted from Figure 2 in Galeano Niño et al.<sup>76</sup>, this plot aids in understanding micro-niche level variations within tumor environments. **D. ASCVD**

**Risk Score Distribution Analysis:** Combined violin and box plot of atherosclerotic cardiovascular disease (ASCVD) risk scores, comparing standard and adjusted scores across a sample. Based on Figure 4a in Schössler-Fiorenza Rose et al.<sup>77</sup>, it facilitates risk assessment and stratification in clinical research. **E. Variance Analysis in Multi-Omics Data:** Boxplot showing the intra-class correlation coefficients for various biomedical categories, indicating variance levels attributed to participant structure. This visualization is based on **Figure 2.a** in Zhou et al.<sup>71</sup>, which is crucial for evaluating consistency across multi-omic datasets. **F. scRNA-seq Data Visualization via UMAP:** UMAP plot derived from scRNA-seq data files (barcodes.tsv, genes.tsv, matrix.mtx), visualizing gene expression patterns across different cell types. The AI visualization component summarizes all input files and iteratively generates the plot. While the output UMAP in Fig F.S2 is not exactly the same as F.S1, by adding the right set of steps, the SDO AI visualization component successfully captured the clusters in F.S2. The prompt is “*Filter the cells in the Seurat object to include only those with an RNA count of less than 100,000. Normalize the data in the Seurat object using the "LogNormalize" method, with a scale factor of 10,000. Identify the top 2,000 variable features (genes) in the dataset using the "vst" (variance-stabilizing transformation) method.*” F.S4 was built on top of F.S2 and a metadata file. The pipeline in each step provides code and documentation of the thought process it went through to generate the visual. The user can use the documentation to guide the model, where necessary, to achieve the desired outcome (image). This process is iterative.

**Fig. 6F** represents an application of single-cell RNA sequencing data visualization. It employs a UMAP technique to visualize data clusters based on the raw files from Wu et al.<sup>80</sup>. Despite inherent variations due to different computational tools and the stochastic nature of UMAP, SDO effectively captures and displays the main clusters, highlighting its adaptability and accuracy in handling complex genomic data. The platform handles new data types and complex multimodal visualizations.

We propose a potential solution to enhance reproducibility: *encouraging authors to provide prompts for future plot generation*. This practice could incentivize the explicit communication of implicit assumptions during the visualization process, significantly improving reproducibility.

## Discussion

Our results with SDO demonstrate that a serverless platform leveraging cloud computing can effectively address challenges in bioinformatics, providing improved access to data and computational resources, particularly for economically disadvantaged and historically marginalized populations. Furthermore, we recognize the challenges associated with extensive time spent on debugging and synchronization for non-programmers, alongside the lengthy upskilling/reskilling required for scientific professionals in non-programming fields. Our platform demonstrates how solutions like SDO can bypass the programming aspect, allowing users to focus on the algorithmic core of the problem. By prioritizing algorithmic thinking over syntax and error handling, we aim to improve problem-solving and critical thinking skills in life sciences education. Our self-paced, personalized learning modules with AI assistance further contribute to the development of domain knowledge.

The emergence of LLMs presents a new set of challenges. The potential for plagiarism through copy-pasting generated content using LLMs necessitates the development of robust anti-cheating measures. While solutions like CodeHelp<sup>81</sup> utilize guardrails specifically designed to prevent the direct revelation of solutions, thereby aiding students in resolving their issues ethically, there remains the challenge of students accessing LLMs without such guardrails. We hypothesize that incorporating context-specific questions could further mitigate the risk of cheating by reducing the accessibility of inappropriate assistance. This approach ensures that the AI support remains aligned with educational goals and maintains academic integrity. Furthermore, standardization and reproducibility issues persist, impeding the achievement of consistent, reliable results essential for validating findings and ensuring trustworthy scientific advancements. One potential solution involves encouraging authors to create, test, and submit their prompts alongside published manuscripts.

## Conclusion

SDO is a comprehensive platform that seamlessly integrates data management, analytics, and educational resources. It stores a wide range of data types including clinical, omics, and wearables data, with the majority being open access. The platform enables robust computational analytics, allowing users to upload and analyze their own datasets. Additionally, SDO offers a variety of educational activities focused on cloud computing and the handling of complex data types. Through these offerings, users develop essential skills in computing and bioinformatics, equipping them for advanced careers in data science. Notably, 22.8% of certified students reported secure positions within the STEM field.

## Methods

### Scalable, Secure, and Sustainable Platform

SDO leverages containerization and virtual machines (VMs) to enhance the learning experience. Containers create a stateless environment that facilitates quick setup and disposal, whereas VMs support a stateful environment necessary for continuous operations and complex computations. Together, these technologies guarantee uninterrupted access to educational and research content, even amid system changes (see **Supplementary Fig. 1A**). Additionally, the platform's microservice architecture enhances scalability and security while reducing management overhead. A front-end cluster manages user access and coordinates the operation of VMs and containers, and a back-end cluster safeguards sensitive data and hosts applications. Furthermore, real-time monitoring tools ensure the performance remains optimal and compliant with HIPAA standards for privacy and security<sup>34,35</sup>.

Further fortifying our platform, SDO deploys within secure environments like **Amazon Bedrock**<sup>36</sup>, **Azure OpenAI Service**<sup>37</sup>, or **GCP Vertex AI**<sup>38</sup> for pre-trained models, with AWS Bedrock serving as the primary environment (see **Supplementary Fig. 1B** and **1C**). This setup gives organizations control over their data and infrastructure within a monitored environment. Using third-party models under stringent data privacy agreements offers an additional layer of protection against data exposure risks—for example, OpenAI approved our request to not use SDO content to train their models. Moreover, sharing data summaries rather than complete datasets minimizes the risk of sensitive information leakage, a technique SDO utilizes in its AI

visualization tool.

Security models designed for LLMs incorporate secure deployment environments, data access controls, and test-time defenses<sup>39</sup>, to safeguard data integrity and protection. Collectively, these strategies, along with robust test-time defenses that analyze user prompts, monitor LLM outputs, and post-process responses to ensure safety and appropriateness, establish a robust security framework, enabling organizations to confidently utilize LLMs while upholding the highest standards of data protection<sup>39-41</sup>.

Moreover, SDO also standardizes modules like notebooks and datasets to enhance accessibility and integration for researchers and learners from diverse educational backgrounds. This standardization promotes consistency and reproducibility in scientific research while continuously updating resources to keep pace with technological advances, supporting the sustainable development of bioinformatics education. SDO, designed as a comprehensive platform, adheres to FAIR principles—ensuring data is findable, accessible, interoperable, and reusable—thus improving resource efficiency and impact<sup>82</sup>. It also facilitates environmental sustainability in precision medicine through shared data resources. By integrating scientific papers as research modules, such as the NightSignal algorithm<sup>42</sup>, into its ecosystem, SDO lowers entry barriers and simplifies learning for beginners while emphasizing the critical, resource-intensive task of curating and cleaning datasets essential for personalized medicine.

### **AI Tutor**

Our LLM-powered AI Tutor developed on the SDO platform, democratizes private tutoring for students who cannot afford or allocate time for traditional methods. This AI Tutor (see **Supplementary Fig. 1B**) is specialized in questions pertinent to bioinformatics. It operates by receiving student inquiries, applying embedding techniques to identify the most relevant content within SDO, and using prompt engineering to generate pertinent responses.

### **LLM-based Data Visualization**

As LLMs continue to evolve, automatic data visualization is becoming increasingly prevalent. Systems like LIDA<sup>43</sup> and Amazon Q<sup>44</sup> exemplify a multi-stage generation approach, showcasing how well-orchestrated pipelines that include LLMs effectively address various challenges. However, its generalizability suffers from restricted data intake formats, often limited to common spreadsheet file types and not suitable for multi-omics datasets.

To address these shortcomings, we leveraged some of LIDA's capabilities such as UI and goal generation and introduced a novel grammar-agnostic data visualization component within the SDO framework (**Supplementary Fig. 1C**). Our component transcends the limitations of prior systems by incorporating robust mechanisms for: **1) Multi-modal analysis**: It seamlessly integrates insights from diverse datasets, enabling comprehensive data exploration; **2) Enhanced data format support**: It ingests a broader range of data formats beyond conventional spreadsheets (e.g., .xls, .csv) to include geospatial information (maps), compressed archives (zips), and even image data; **3) Automatic error handling**: Our system proactively identifies and addresses potential issues during the visualization generation process.

This includes situations like exceeding model capacity due to large context size or when the LLM fails to produce valid executable code. This expanded data intake empowers researchers to conduct richer analyses and unlock hidden patterns across a broader spectrum of information sources, including not just traditional tabular data but also spatial relationships, archived content, and potentially valuable visual information; and **4) Supporting both Python and R:** Our platform not only supports Python but also R, thereby catering to a broader range of bioinformatics workflows and user preferences. For example, many researchers use R's Seurat package for single-cell RNA-seq data analysis, while others prefer Python's Scanpy for similar tasks.

The initial step involves extracting metadata from uploaded datasets, which includes critical details like column names, data types, and record counts. Following metadata extraction, a representative sample of the dataset is taken to facilitate quick data analysis. Summarization then generates concise descriptions, including statistical summaries and key pattern identifications. Semantic typing categorizes the data into meaningful types, which is essential for selecting appropriate visualization techniques. The selection and instantiation of prompt templates guide the LLM in generating necessary codes or descriptions for creating visualizations. Mechanisms are in place to handle errors, and the process includes steps to iterate through the inference process, maintaining memory and context to complete the output. In scenarios involving multi-modal contexts, the pipeline accommodates the complexity of handling multiple datasets, ensuring the visualizations are based on relevant and accurate data. This structured approach to data visualization enhances the effectiveness of data analysis, making complex information more accessible and actionable.

### **Software Availability**

The software platform supporting the findings of this study is available at <https://dataocean.stanford.edu/>. Access to the platform can be granted upon request. Interested parties should visit the website to initiate a request for platform access.

### **Data Availability**

The datasets supporting the findings of Figures 5 and 6 are publicly accessible, as detailed in the "Data Availability" sections of the respective source papers. For the Stanford Data Ocean's (SDO) learners' pre- and post-surveys, as well as the AI Tutor questions, all personally identifiable information has been removed to ensure privacy and confidentiality. This includes the deletion of email addresses, first and last names, and any other information that could be used to identify individual participants.

### **Acknowledgments**

This work was supported by NIH grants (5R01NR020105, U54HG012723, S10OD025212, U01HG007611, U54HG006996, U54DK102556) and gifts from the departmental funding from the Stanford Genetics department. SMS-FR was supported by the National Institutes of Health (NIH) Grant K08 ES028825. We acknowledge Amazon Web Services, Microsoft Azure and OpenAI for this research. This research also received support from Stanford Institute for Human-Centered Artificial Intelligence (HAI) and Stanford Accelerator for Learning. We

acknowledge the Stanford Genetics Bioinformatics Service Center for providing this research's gateway to the SCG cluster, Google Cloud Platform, and Amazon Web Services. We gratefully acknowledge Conectado Inc. for their crucial support in the outreach and recruitment of underserved students for our research.

## Contributions

All authors read, revised, and approved the manuscript.

## Competing interests

MPS is a cofounder and scientific advisor of Personalis, SensOmics, Qbio, January AI, Fodsel, Filtricine, Protos, RTHM, Iollo, Marble Therapeutics, Crosshair Therapeutics, NextThought, and Mirvie. He is also a scientific advisor of Jupiter, Neuvivo, Swaza, Mitrix, Yuvan, TranscribeGlass, and Applied Cognition. PS is currently an employee of Amazon Web Services. The other authors declare no competing interests.

## References:

1. Pravettoni, G., and Triberti, S.. "P5 eHealth: An Agenda for the Health Technologies of the Future." , 2020, pp. 75-90. OAPEN, [library.oapen.org/bitstream/handle/20.500.12657/22850/1/1007311.pdf#page=76](http://library.oapen.org/bitstream/handle/20.500.12657/22850/1/1007311.pdf#page=76).
2. Gusila, I., Topa, A., Zarbailov, N., Lungu, N., Curocichin, G. (2024). Personalised Medicine Implementation in Low- and Middle-Income Countries. In: Sontea, V., Tiginyanu, I., Railean, S. (eds) 6th International Conference on Nanotechnologies and Biomedical Engineering. ICNBME 2023. IFMBE Proceedings, vol 92. Springer, Cham. [https://doi.org/10.1007/978-3-031-42782-4\\_44](https://doi.org/10.1007/978-3-031-42782-4_44)
3. Pramesh, C.S., Badwe, R.A., Bhoo-Pathy, N. *et al.* Priorities for cancer research in low- and middle-income countries: a global perspective. *Nat Med* 28, 649–657 (2022). <https://doi.org/10.1038/s41591-022-01738-x>
4. Budd A, Corpas M, Brazas MD, Fuller JC, Goecks J, Mulder NJ, et al. (2015) A Quick Guide for Building a Successful Bioinformatics Community. *PLoS Comput Biol* 11(2): e1003972. <https://doi.org/10.1371/journal.pcbi.1003972>
5. Snyder, Michael P., et al. "Perspectives on ENCODE." *Nature* 583.7818 (2020): 693-698.
6. Turnbaugh PJ, Ley RE, Hamady M, Fraser-Liggett CM, Knight R, Gordon JI. The human microbiome project. *Nature*. 2007 Oct 18;449(7164):804-10. doi: 10.1038/nature06244. PMID: 17943116; PMCID: PMC3709439. Bernstein BE, Birney E, Dunham I, Green ED, Gunter C, et al. (2012) An integrated encyclopedia of DNA elements in the human genome. *Nature* 489: 57–74. pmid:22955616
7. International Cancer Genome Consortium. "International network of cancer genome projects." *Nature* 464.7291 (2010): 993.
8. Ramsay, M. et al. H3Africa AWI-Gen Collaborative Centre: a resource to study the interplay between genomic and environmental risk factors for cardiometabolic diseases in four sub-Saharan African countries. *Glob. Health Epidemiol. Genom.* 1, e20 (2016).
9. Skantharajah, Neerjah, et al. "Equity, diversity, and inclusion at the Global Alliance for Genomics and Health." *Cell genomics* 3.10 (2023).
10. Choudhury, A., Aron, S., Botigué, L.R. *et al.* High-depth African genomes inform human migration and health. *Nature* 586, 741–748 (2020). <https://doi.org/10.1038/s41586-020-2859-7>

11. Sirugo G, Williams SM, Tishkoff SA. The Missing Diversity in Human Genetic Studies. *Cell*. 2019 Mar 21;177(1):26-31. doi: 10.1016/j.cell.2019.02.048. Erratum in: *Cell*. 2019 May 2;177(4):1080. doi: 10.1016/j.cell.2019.04.032. PMID: 30901543; PMCID: PMC7380073.
12. Chadwick, Jennifer Q., et al. "Genomic research and American Indian tribal communities in Oklahoma: learning from past research misconduct and building future trusting partnerships." *American journal of epidemiology* 188.7 (2019): 1206-1212.
13. Sanford, James A., et al. "Molecular transducers of physical activity consortium (MoTrPAC): mapping the dynamic responses to exercise." *Cell* 181.7 (2020): 1464-1474.
14. Jain, Sanjay, et al. "Advances and prospects for the Human BioMolecular Atlas Program (HuBMAP)." *Nature cell biology* 25.8 (2023): 1089-1100.
15. Rozenblatt-Rosen, Orit, et al. "The human tumor atlas network: charting tumor transitions across space and time at single-cell resolution." *Cell* 181.2 (2020): 236-249.
16. Bridge2AI <https://commonfund.nih.gov/bridge2ai>; Accessed 8 June,2024.
17. Peterson, Jane, et al. "The NIH human microbiome project." *Genome research* 19.12 (2009): 2317-2323.
18. Lonsdale, John, et al. "The genotype-tissue expression (GTEx) project." *Nature genetics* 45.6 (2013): 580-585.
19. Mollick, Ethan, and Lilach Mollick. "Assigning AI: Seven approaches for students, with prompts." *arXiv preprint arXiv:2306.10052* (2023).
20. Nazi, Kim M., et al. "Consumer health informatics: engaging and empowering patients and families." *Clinical informatics study guide: text and review* (2016): 459-500.
21. Zhang, Peng, and Maged N. Kamel Boulos. "Generative AI in medicine and healthcare: Promises, opportunities and challenges." *Future Internet* 15.9 (2023): 286.
22. Alowais, Shuroug A., et al. "Revolutionizing healthcare: the role of artificial intelligence in clinical practice." *BMC medical education* 23.1 (2023): 689.
23. DeLozier, S. J., & Rhodes, M. G. (2017). Assessing the effectiveness of personalized learning in a large, introductory biology course. *Journal of Microbiology & Biology Education*, 18(1), 1-7.
24. Brown, Peter C., Henry L. Roediger III, and Mark A. McDaniel. *Make it stick: The science of successful learning*. Harvard University Press, 2014.
25. Dosch and Zidon. (2014). "The Course Fit Us": Differentiated Instruction in the College Classroom. *International Journal of Teaching and Learning in Higher Education*. 26(3): 343-357.
26. Tomlinson, et. al. (2003). Differentiating Instruction in Response to Student Readiness, Interest, and Learning Profile in Academically Diverse Classrooms: A Review of Literature. *Journal for the Education of the Gifted*. 27(2-3): 119-145
27. Turner, et. al. (2017). Differentiating Instruction for Large Classes in Higher Education. *International Journal of Teaching and Learning in Higher Education*. 29(3): 490-500.
28. Bahmani, A., Sedigh, S., & Hurson, A. (2012). Ontology-based recommendation algorithms for personalized education. In *Database and Expert Systems Applications: 23rd International Conference, DEXA 2012, Vienna, Austria, September 3-6, 2012. Proceedings, Part II* 23 (pp. 111-120). Springer Berlin Heidelberg.
29. Cummings, M. P., & Temple, G. G. (2010). Broader incorporation of bioinformatics in education: opportunities and challenges. *Briefings in bioinformatics*, 11(6), 537-543.
30. Ranganathan, S. (2005). Bioinformatics education—perspectives and challenges. *PLoS computational biology*, 1(6), e52.



31. Bertero, L., & Tuvé, C. (2021). Biomedical Big Data: Challenges and Opportunities. In M. Dashti (Ed.), *Data Science, Artificial Intelligence and Machine Learning Applications* (pp. 135-158). Springer.
32. Nagarajan, M., Verma, A., & McCarroll, R. (2020). Use of Cloud Computing Technologies for Biomedical Data Analysis. In *Handbook of Big Data Technologies* (pp. 1-25). Springer.
33. Kluyver, Thomas, et al. "Jupyter Notebooks-a publishing format for reproducible computational workflows." *Elpub* 2016 (2016): 87-90.
34. Amazon Web Services. "Architecting of HIPAA Security and Compliance on Amazon Web Services." Accessed 8 June, 2024. <https://docs.aws.amazon.com/pdfs/whitepapers/latest/architecting-hipaa-security-and-compliance-on-aws/architecting-hipaa-security-and-compliance-on-aws.pdf#document-revisions>
35. Google Cloud Platform. "HIPAA Compliance on Google Cloud". Accessed 8 June, 2024. <https://cloud.google.com/security/compliance/hipaa>
36. AWS Bedrock, AWS. <https://aws.amazon.com/bedrock/>. Accessed 8 June, 2024.
37. Microsoft Azure OpenAI Service. <https://azure.microsoft.com/en-us/products/ai-services/openai-service>. Accessed 8 June, 2024.
38. GCP Vertex AI. <https://cloud.google.com/vertex-ai>. Accessed 8 June, 2024.
39. Yao, Yifan, et al. "A survey on large language model (llm) security and privacy: The good, the bad, and the ugly." *High-Confidence Computing* (2024): 100211.
40. Li, Haoran, et al. "Privacy in Large Language Models: Attacks, Defenses and Future Directions." arXiv, arXiv:2310.10383, 2023.
41. Zhang, Zhexin, et al. "SafetyBench: Evaluating the Safety of Large Language Models with Multiple Choice Questions." arXiv, arXiv:2309.07045, 2023.
42. Alavi, Arash, et al. "Real-time alerting system for COVID-19 and other stress events using wearable data." *Nature medicine* 28.1 (2022): 175-184.
43. Dibia, V. (2023). Lida: A tool for automatic generation of grammar-agnostic visualizations and infographics using large language models. arXiv preprint arXiv:2303.02927.
44. Amazon Q in QuickSight. <https://aws.amazon.com/quicksight/q/>. Accessed 8 June, 2024.
45. Mengstie, B. Impact of microfinance on women's economic empowerment. *J Innov Entrep* 11, 55 (2022). <https://doi.org/10.1186/s13731-022-00250-3>
46. UNICEF. "Girls' Education." UNICEF, <https://www.unicef.org/education/girls-education>.
47. Duncan, A., Premnazeer, M. & Sithamparanathan, G. Massive open online course adoption amongst newly graduated health care providers. *Adv in Health Sci Educ* 27, 919–930 (2022). <https://doi.org/10.1007/s10459-022-10113-x>
48. Fu, Q., Gao, Z., Zhou, J., & Zheng, Y. (2021). CLSA: A novel deep learning model for MOOC dropout prediction. *Computers & Electrical Engineering*, 94, 107315. <https://doi.org/10.1016/j.compeleceng.2021.107315>
49. Gütl, Christian, et al. "Attrition in MOOC: Lessons learned from drop-out students." *Learning Technology for Education in Cloud. MOOC and Big Data: Third International Workshop, LTEC 2014, Santiago, Chile, September 2-5, 2014. Proceedings 3*. Springer International Publishing, 2014.
50. Alhadabi A. Science Interest, Utility, Self-Efficacy, Identity, and Science Achievement Among High School Students: An Application of SEM Tree. *Front Psychol.* 2021 Sep 9;12:634120. doi: 10.3389/fpsyg.2021.634120. PMID: 34566743; PMCID: PMC8458621.
51. Honicke T., Broadbent J. (2016). The influence of academic self-efficacy on academic performance: a systematic review. *Educ. Res. Rev.* 17, 63–84. 10.1016/j.edurev.2015.11.002

52. Stets J., Brenner P., Burke P., Serpe R. (2017). The science identity and entering a science occupation. *Soc. Sci. Res.* 64, 1–14. 10.1016/j.ssresearch.2016.10.016
53. Kirbulut Z., Uzuntiryaki-Kondakci E. (2018). Examining the mediating effect of science self-efficacy on the relationship between metavariables and science achievement. *Int. J. Sci. Educ.* 41, 995–1014. 10.1080/09500693.2019.1585594
54. Anthropic's Claude 2.1 on Amazon Bedrock, Accessed 8 June, 2024. <https://aws.amazon.com/about-aws/whats-new/2023/11/claude-2-1-foundation-model-anthropic-amazon-bedrock/>. Accessed 8 June, 2024.
55. Anthropic's Claude 3 Haiku on Amazon Bedrock. <https://aws.amazon.com/about-aws/whats-new/2024/03/anthropics-claude-3-haiku-model-amazon-bedrock/>. Accessed 8 June, 2024.
56. Anthropic's Claude 3 Opus on Amazon Bedrock, Accessed 8 June, 2024. <https://aws.amazon.com/about-aws/whats-new/2024/04/anthropics-claude-3-opus-amazon-bedrock/>. Accessed 8 June, 2024.
57. Anthropic's Claude 3 Sonnet on Amazon Bedrock, Accessed 8 June, 2024. <https://aws.amazon.com/about-aws/whats-new/2024/03/anthropics-claude-3-sonnet-model-amazon-bedrock/>. Accessed 8 June, 2024.
58. Google, Gemini Team. Gemini 1.5-pro: Unlocking multimodal understanding across millions of tokens of context. arXiv. <https://doi.org/10.48550/arXiv.2403.05530> (2024).
59. GPT-3.5 Turbo. OpenAI API. <https://platform.openai.com/docs/models/gpt-3-5-turbo>. Accessed 8 June 2024.
60. GPT-4 Turbo and GPT-4. OpenAI API. <https://platform.openai.com/docs/models/gpt-4-turbo-and-gpt-4>. Accessed 8 June 2024.
61. GPT-4o. OpenAI API. <https://platform.openai.com/docs/models/gpt-4o>. Accessed 8 June 2024.
62. Meta's Llama 2 model 70B on Amazon Bedrock. <https://aws.amazon.com/about-aws/whats-new/2023/11/llama-2-70b-foundation-model-meta-amazon-bedrock/>. Accessed 8 June,2024.
63. Chen, L., Zaharia, M., and J. Zou. "How Is ChatGPT's Behavior Changing over Time?" *Harvard Data Science Review*, vol. 6, 2024
64. Kobicheva, Aleksandra, et al. "Students' Affective Learning Outcomes and Academic Performance in the Blended Environment at University: Comparative Study." *Sustainability*, vol. 14, no. 18, 2022, p. 11341. MDPI, <https://www.mdpi.com/2071-1050/14/18/11341>.
65. Hornbæk, Kasper, and Hertzum, Morten. "Technology Acceptance and User Experience: A Review of the Experiential Component in HCI." *ACM Transactions on Computer-Human Interaction*, vol. 24, no. 5, 2017, pp. 1-30, doi:10.1145/3127358.
66. Karan Girotra, Lennart Meincke, Christian Terwiesch, Karl T. Ulrich (July 2023): Ideas are Dimes a Dozen: Large Language Models for Idea Generation in Innovation, [https://papers.ssrn.com/sol3/papers.cfm?abstract\\_id=4526071](https://papers.ssrn.com/sol3/papers.cfm?abstract_id=4526071)
67. Guzik, Erik E., Christian Byrge, and Christian Gilde. "The originality of machines: AI takes the Torrance Test." *Journal of Creativity* 33.3 (2023): 100065.
68. Peng, Sida, et al. "The impact of ai on developer productivity: Evidence from github copilot." arXiv preprint arXiv:2302.06590 (2023).
69. Cormen, Thomas H., et al. *Introduction to algorithms*. MIT press, 2022.
70. Mishra, Tejaswini, et al. "Pre-symptomatic detection of COVID-19 from smartwatch data." *Nature biomedical engineering* 4.12 (2020): 1208-1220.
71. Zhou, Wenyu, et al. "Longitudinal multi-omics of host–microbe dynamics in prediabetes." *Nature* 569.7758 (2019): 663-671.

72. 1000 Genomes Project Consortium. "A global reference for human genetic variation." *Nature* 526.7571 (2015): 68.
73. Forbes, S., et al. "COSMIC 2005." *British journal of cancer* 94.2 (2006): 318-322.
74. Hickey, John W., et al. "Organization of the human intestine at single-cell resolution." *Nature* 619.7970 (2023): 572-584.
75. McNamara, Katherine L., et al. "Spatial proteomic characterization of HER2-positive breast tumors through neoadjuvant therapy predicts response." *Nature cancer* 2.4 (2021): 400-413.
76. Galeano Niño, Jorge Luis, et al. "Effect of the intratumoral microbiota on spatial and cellular heterogeneity in cancer." *Nature* 611.7937 (2022): 810-817.
77. Schüssler-Fiorenza Rose, Sophia Miryam, et al. "A longitudinal big data approach for precision health." *Nature medicine* 25.5 (2019): 792-804.
78. Boettiger, Carl. "An introduction to Docker for reproducible research." *ACM SIGOPS Operating Systems Review* 49.1 (2015): 71-79.
79. Papin, Jason A., et al. "Improving reproducibility in computational biology research." *PLOS Computational Biology* 16.5 (2020): e1007881.
80. Wu, Sunny Z., et al. "A single-cell and spatially resolved atlas of human breast cancers." *Nature genetics* 53.9 (2021): 1334-1347.
81. Liffiton, Mark, et al. "Codehelp: Using large language models with guardrails for scalable support in programming classes." *Proceedings of the 23rd Koli Calling International Conference on Computing Education Research*. 2023.
82. Wilkinson, Mark D., et al. "The FAIR Guiding Principles for scientific data management and stewardship." *Scientific data* 3.1 (2016): 1-9.
83. Guadagnolo, B. Ashleigh, et al. "Medical mistrust and less satisfaction with health care among Native Americans presenting for cancer treatment." *Journal of health care for the poor and underserved* 20.1 (2009): 210-226.
84. Pacheco, Christina M., et al. "Moving forward: breaking the cycle of mistrust between American Indians and researchers." *American journal of public health* 103.12 (2013): 2152-2159.
85. Contrepois, Kévin, et al. "Molecular choreography of acute exercise." *Cell* 181.5 (2020): 1112-1130.

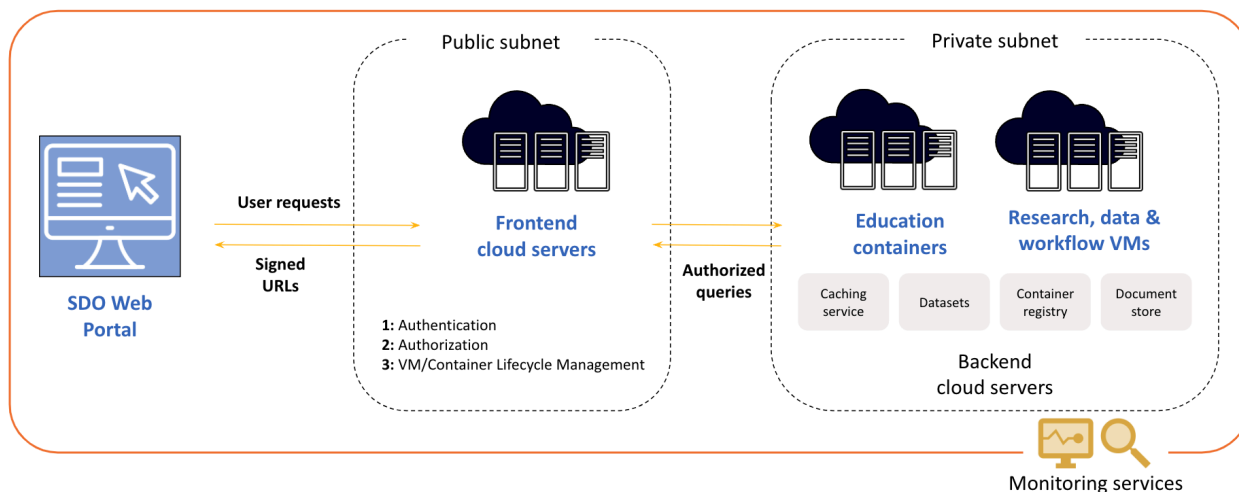

**A. Architecture of the Platform (Data, VMs/Containers, and Workflows)**

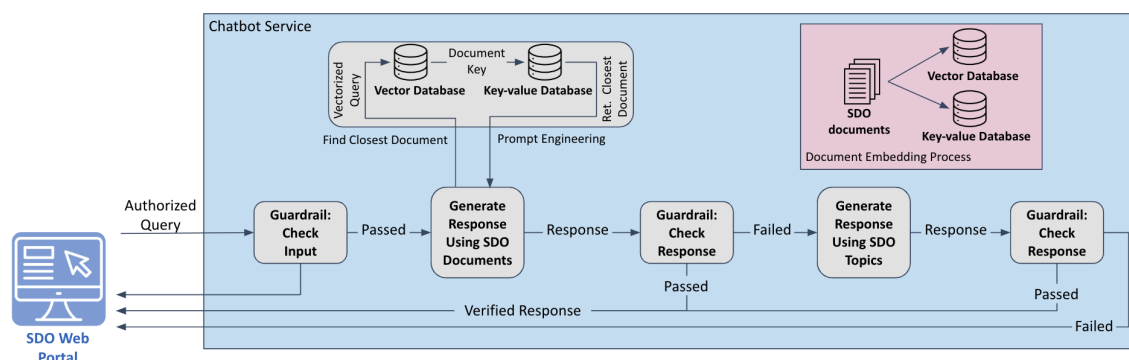

**B. AI Tutor as a Chatbot**

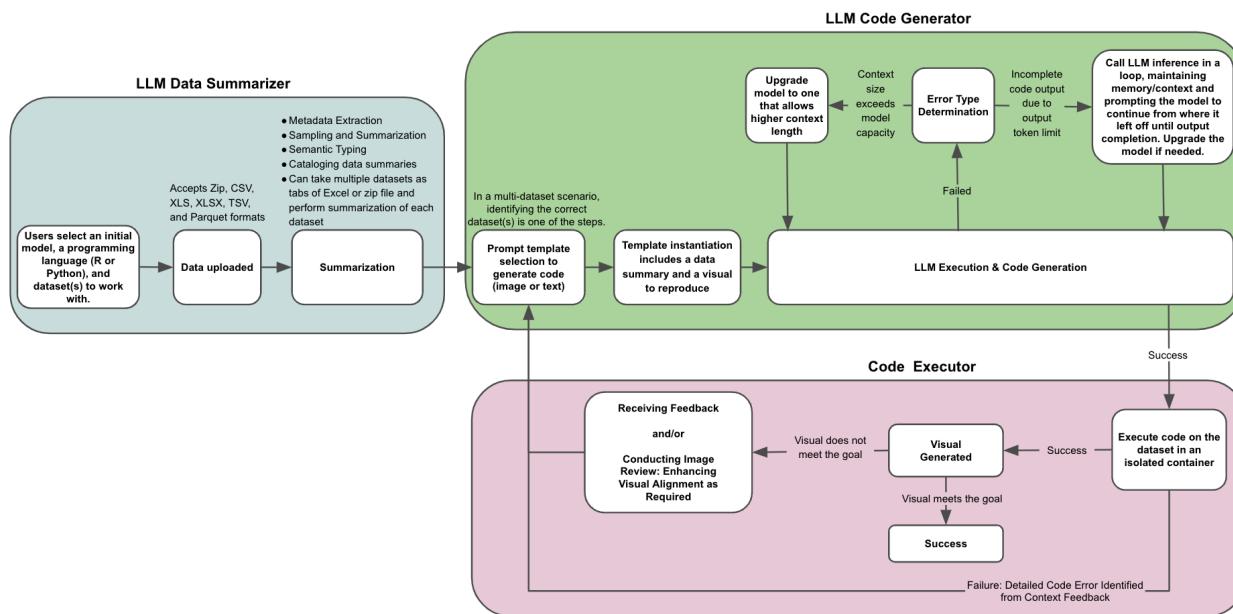

**C. AI Tutor for Data Visualization**

**Supplementary Figure 1: Stanford Data Ocean Architecture**

**Supplementary Table 1.** Summary of Challenges Faced by Scholarship Applicants (June 2024)

| <b>Challenge Category</b>                   | <b>Application Percentage</b> | <b>Application Quantity</b> | <b>Affected Demographics/Regions</b>                                                                                                                                                |
|---------------------------------------------|-------------------------------|-----------------------------|-------------------------------------------------------------------------------------------------------------------------------------------------------------------------------------|
| Financial Constraints                       | 62.7%                         | 276                         | Low-income families, immigrants, international students residing in developed nations, and residents in countries facing economic crises or sanctions (e.g., Nigeria, Turkey, Iran) |
| Lack of Interdisciplinary Medical Education | 18%                           | 79                          | Residents in nations with early Precision Medicine development, rural areas, or politically unstable regions (e.g., Ukraine)                                                        |
| Limited Time Due to Responsibilities        | 5.2%                          | 23                          | PhD/MD students with busy schedules, individuals with multiple jobs or caring duties                                                                                                |

**Supplementary Table 2.** AI Tutor Performance Metrics

| <b>Category</b>      | <b>Definition</b>                                                                               | <b>Value</b> |
|----------------------|-------------------------------------------------------------------------------------------------|--------------|
| True Negatives (TN)  | The AI Tutor correctly identifies and ignores questions that are not related to SDO content.    | 170          |
| True Positives (TP)  | The AI Tutor accurately identifies and appropriately responds to SDO-content-related questions. | 1,785        |
| False Positives (FP) | The AI Tutor incorrectly responds to non-SDO-content-related questions.                         | 0            |
| False Negatives (FN) | The AI Tutor fails to recognize or incorrectly answers SDO-content-related questions.           | 126          |
